# Supplementary material
Source: HighWire-hosted journal article supplement (https://bmjopen.bmj.com/content/8/2/e018701)
Supplement: inline-supplementary-material-2 [file inline-supplementary-material-2.pdf]

## Preliminary data extraction form

### **Reviewer identification**

Date:

Reference ID:

Name:

### **Article description**

Title:

Authors:

Institution:

Corresponding email:

Type of source (journal article/ grey literature):

Year:

### **Aims and study design**

Aims/objectives:

Study design:

### **Methodology:**

1. Settings

a) Country/city:

b) Urban/rural area:

2. Special characteristics of the population:

a) Age structure:

b) Sex structure:

c) Ethnic features:

d) Educational level:

e) Socioeconomic level:

f) Other characteristics:

3. Study exclusions:

4. Exposure:

- a) Food environment definition:
- b) Food sources/outlet definition:
- c) Data source
- d) Year exposure data collected:
- e) Type of food environment variable:
- f) Food environment variable definition:
- g) Methods of data collection

5. Outcomes:

- a) Reported outcomes:
- b) Outcomes definition:
- c) Type of measure (self-reported/measured):

### **Statistical Analysis**

- a) Modelling strategy
- b) Reported bias
- c) Reported confounders

### **Key findings:**

Main findings:

### **Limitations:**

Study limitations:
